# Supplementary material for: Emotional response in schizophrenia to the “36 questions that lead to love”: Predicted and experienced emotions regarding a live social interaction
Source: PLoS One. 2019 Feb 27;14(2):e0212069. doi: 10.1371/journal.pone.0212069 (PMC6392255; doi:10.1371/journal.pone.0212069)
Supplement: S3 File — Study data. (CSV) [file pone.0212069.s003.csv]

Subject	group	Gender	education	Age	CountryBorn	CountryBornOther	LivedUS	LivedUSyears	Race	RaceOther	EngAge	CPZequl	SANS1	SANS2	SANS3	SANS4	SANS5	SANS6	SANS7	SANS8	SANS9	SANS10	SANS11	SANS12	SANS13	SANS14	SANS15	SANS16	SANS17	SANS18	SANS19	SANS20	SANS21	SANS22	SANS23	SANS24	SANS25	SAPS1	SAPS2	SAPS3	SAPS4	SAPS5	SAPS6	SAPS7	SAPS8	SAPS9	SAPS10	SAPS11	SAPS12
101	1	1	14	61	1	99	1	99	5	99	1		0	0	0	0	0	0	0	0	0	0	0	0	0	0	0	0	0	0	1	0	0	0	0	0	0	0	0	0	0	0	0	0	0	0	0	0	0
102	1	1	16	28	1	99	1	99	4	99	1		0	0	0	0	0	0	0	0	0	0	0	0	0	0	0	0	0	0	1	0	0	0	0	0	0	0	0	0	0	0	0	0	0	0	0	0	0
103	1	1	13	47	5	Mexico	1	99	6	99	2		0	0	0	0	0	0	0	0	0	0	0	0	0	0	0	0	0	0	1	0	0	0	0	2	0	0	0	0	0	0	0	0	0	0	0	0	0
104	1	2	20	57	2	99	2	26	2	99	4		0	0	0	0	0	0	0	0	0	0	0	0	0	0	0	0	0	0	1	0	0	0	0	0	0	0	0	0	0	0	0	0	0	0	0	0	0
105	1	2	17	49	1	99	1	99	6	99	1		0	0	0	0	0	0	0	0	0	0	0	0	0	0	0	0	0	0	1	0	2	0	0	0	0	0	0	0	0	0	0	0	0	0	0	0	0
106	1	2	16	36	3	99	2	0	2	99	6		0	0	0	0	0	0	0	0	0	0	0	1	0	2	0	0	0	0	1	0	1	0	0	0	0	0	0	0	0	0	0	0	0	0	0	0	0
107	1	1	14	34	5	Ukraine	2	1	5	99	3		0	0	0	0	0	0	0	0	0	0	0	0	0	0	0	0	0	0	1	0	0	0	0	0	0	0	0	0	0	0	0	0	0	0	0	0	0
108	1	2	18	59	5	India	2	28	3	99	2		0	0	0	0	0	0	0	0	1	0	0	0	0	0	0	0	0	0	1	0	0	0	0	0	0	0	0	0	0	0	0	0	0	0	0	0	0
109	1	1	16	23	1	99	1	99	5	99	1		0	0	0	0	0	1	0	0	0	0	0	0	0	0	0	0	0	0	1	0	0	0	0	3	0	0	0	0	0	0	0	0	0	0	0	0	0
110	1	1	17	31	5	Vietm	2	6	4	99	4		0	0	0	0	0	0	0	0	0	0	0	0	0	0	0	0	0	0	1	0	0	0	0	3	0	0	0	0	0	0	0	0	0	0	0	0	0
111	1	1	13	46	1	99	1	99	5	99	1		0	0	0	0	0	0	0	0	0	0	0	0	0	1	1	0	0	0	1	0	0	0	0	3	1	0	0	0	0	0	0	0	0	0	0	0	0
112	1	2	14	52	1	99	1	99	5	99	1		0	0	0	3	0	0	0	0	0	0	0	0	0	0	0	0	0	0	1	0	0	0	0	0	0	0	0	0	0	0	0	0	0	0	0	0	0
113	1	2	16	54	1	99	1	99	5	99	1		0	0	0	0	0	0	0	0	0	0	0	0	0	0	0	0	0	0	1	0	0	0	0	0	0	0	0	0	0	0	0	0	0	0	0	0	0
114	1	2	16	57	1	99	1	99	5	99	1		0	0	0	0	0	0	0	0	0	0	0	0	0	0	0	0	0	0	1	0	0	0	0	2	0	0	0	0	0	0	0	0	0	0	0	0	0
115	1	2	15	26	1	99	2	25	6	99	1		0	0	0	0	0	0	0	0	0	0	0	0	0	0	0	0	0	0	1	0	0	0	0	0	0	0	0	0	0	0	0	0	0	0	0	0	0
116	1	1	16	22	5	South Africa	1	99	5	99	1		0	0	0	0	0	0	0	0	0	0	0	0	0	0	0	0	0	0	1	0	0	0	0	0	0	0	0	0	0	0	0	0	0	0	0	0	0
117	1	2	14	62	1	99	1	99	5	99	1		0	0	0	0	0	0	0	0	0	0	0	0	0	0	0	0	0	0	1	1	1	1	0	0	0	0	0	0	0	0	0	0	0	0	0	0	0
118	1	1	16	51	1	99	1	99	5	99	1		2	1	1	1	2	0	1	1	1	0	0	0	0	0	0	0	0	0	1	1	0	0	0	3	1	0	0	0	0	0	0	0	0	0	0	0	0
119	1	1	13	59	1	99	1	99	5	99	2		0	0	0	0	0	2	0	0	0	0	0	0	0	2	0	0	0	0	1	0	1	0	0	2	1	0	0	0	0	0	0	0	0	0	0	0	0
120	1	1	12	30	1	99	1	99	1	99	1		1	0	0	0	0	0	1	0	0	0	0	0	0	1	3	1	1	1	1	1	2	1	0	2	0	0	0	0	0	0	0	0	0	0	0	0	0
121	1	1	14	38	1	99	1	99	5	99	1		0	0	0	0	0	0	1	0	0	0	0	0	0	0	0	0	0	0	1	0	0	0	0	0	0	0	0	0	0	0	0	0	0	0	0	0	0
122	1	2	13	51	1	99	1	99	5	99	1		0	0	0	0	0	0	0	0	0	0	0	0	0	2	0	0	0	2	1	0	0	2	0	0	0	0	0	0	0	0	0	0	0	0	0	0	0
123	1	1	18	38	5	India	1	99	3	99	2		0	0	0	0	0	0	0	0	0	0	0	0	0	0	0	0	0	0	1	0	0	0	0	0	1	0	0	0	0	0	0	0	0	0	0	0	0
124	1	2	14	54	1	99	1	99	5	99	1		0	0	0	0	0	0	0	0	0	0	0	0	0	0	0	0	0	0	1	0	0	0	0	0	0	0	0	0	0	0	0	0	0	0	0	0	0
125	1	1	14	38	1	99	1	99	6	99	2		0	0	0	0	0	0	0	0	0	0	0	0	0	0	0	0	0	0	1	0	0	0	0	2	0	0	0	0	0	0	0	0	0	0	0	0	0
126	1	1	16	49	1	99	1	99	5	99	1		0	0	0	0	0	0	0	0	0	0	0	0	0	0	0	0	0	0	1	0	0	0	0	2	0	0	0	0	0	0	0	0	0	0	0	0	0
127	1	1	16	22	1	99	2	10	2	99	2		0	0	0	0	0	0	0	0	0	0	0	0	0	0	0	0	0	0	1	0	0	0	0	0	0	0	0	0	0	0	0	0	0	0	0	0	0
128	1	2	14	27	1	99	1	99	6	99	1		0	0	0	0	0	0	0	0	0	0	0	0	0	0	0	0	0	0	1	0	0	0	0	0	0	0	0	0	0	0	0	0	0	0	0	0	0
129	1	1	17	32	1	99	1	99	3	99	1		0	0	0	0	0	0	0	0	0	0	0	0	0	0	0	0	0	0	1	0	0	0	0	0	0	0	0	0	0	0	0	0	0	0	0	0	0
130	1	1	20	36	1	99	1		1	99	1		0	0	0	0	0	0	0	0	0	0	0	0	0	0	0	0	0	0	1	0	0	0	0	3	0	0	0	0	0	0	0	0	0	0	0	0	0
201	2	2	14	62	1	99	1	99	5	99	1	261.12	3	0	2	0	0	0	2	3	3	0	0	0	0	0	0	4	4	4	0	4	5	4	0	5	2	5	5	5	5	0	0	5	0	0	0	0	0
202	2	1	12	29	1	99	1	99	5	99	3	548	2	0	0	0	0	0	0	2	0	0	0	0	0	0	2	0	0	0	0	0	0	0	0	5	2	4	4	3	2	0	4	4	5	0	3	2	3
203	2	2	14	47	1	99	1	99	5	99	2	928.16	0	0	0	0	0	0	0	0	0	0	0	0	0	0	0	0	0	0	0	0	0	0	0	3	2	0	0	0	1	0	1	1	0	0	0	0	0
204	2	2	12	59	1	99	1	99	1	99	1	1175.66	0	0	0	0	0	0	0	0	0	0	0	0	0	0	0	0	0	0	0	0	0	0	0	4	2	5	5	5	0	3	3	5	4	0	0	0	0
205	2	1	18	61	1	99	2	40	5	99	1	548	0	0	0	0	0	0	0	0	0	0	0	0	0	0	0	2	2	2	0	2	2	2	0	0	0	4	4	0	2	2	4	4	4	0	0	0	0
206	2	2	15	25	5	El Salvador	2	16	6	99	3	177.07	0	0	0	0	0	0	0	0	0	0	0	0	0	0	0	0	0	0	0	0	0	0	0	0	0	3	3	0	0	0	0	3	0	0	0	0	0
207	2	1	18	36	1	99	1	99	8	99	1	571.46	0	0	0	0	0	0	0	0	0	0	0	0	0	0	0	0	0	0	0	0	0	0	0	0	0	4	4	4	0	0	0	4	0	4	0	0	0
208	2	2	16	57	1	99	1	99	1	99	1	928.16	0	0	0	0	0	0	0	0	0	0	0	0	0	0	0	0	0	0	0	0	0	0	0	0	0	0	0	0	0	0	0	0	0	0	0	3	0
209	2	1	12	56	1	99	1		1	99	1	29.69	0	0	0	0	0	0	0	0	0	0	0	0	0	0	0	0	0	0	0	0	0	0	0	2	0	0	0	0	0	0	0	0	0	0	0	0	0
210	2	1	12	62	1	99	2		5	99	1	168.57	2	0	0	3	0	0	2	2	0	0	0	0	0	0	3	2	3	3	0	3	3	3	0	4	2	4	4	0	0	0	0	4	2	0	0	4	4
211	2	2	12	44	1	99	1		9		1	571.46	2	0	0	4	0	0	0	2	0	0	0	0	0	0	0	3	2	3	0	3	3	3	0	2	0	3	3	3	0	0	2	3	3	0	2	0	0
212	2	1	12	52	1	99	1		1	99	1	513.39	2	0	0	0	0	0	2	2	0	0	0	0	0	0	4	4	4	4	0	0	4	4	0	4	2	0	0	0	0	0	0	0	0	0	0	0	0
213	2	2	14	43	5	Panama	2		1	99	3	548	4	4	3	0	3	0	4	4	2	0	0	0	2	0	3	3	3	4	0	3	4	4	0	3	2	0	0	0	0	0	0	0	0	0	0	0	0
214	2	1	13	30	1	99	1		6	99	1	623.28	0	0	0	0	0	0	0	0	0	0	0	0	0	0	0	0	0	0	0	0	0	0	0	2	0	0	0	0	0	0	0	0	0	0	0	0	0
215	2	2	12	63	1	99	1		5	99	1	340.98	0	0	0	0	0	0	0	0	0	0	0	0	0	4	2	2	3	2	0	2	2	2	0	0	0	4	3	0	3	0	3	4	0	0	0	2	0
216	2	2	12	63	1	99	1	99	5	99	1	843.09	0	0	0	0	0	0	0	0	0	0	0	0	0	0	0	0	0	0	0	3	2	2	0	0	0	5	5	0	0	0	0	5	4	0	0	0	5
[truncated: 92 more columns]
